# Supplementary material for: LipiDecipher: A Structure-Oriented Framework for Mechanistic Interpretation in Clinical Lipidomics
Source: Research Square preprint supplement (doi:10.21203/rs.3.rs-7238340/v1), 2025-08-19
Supplement: Supplementary file 1 [file 7069b99f5a7ec4e53955d1d4.docx]

**Supplemental figures**


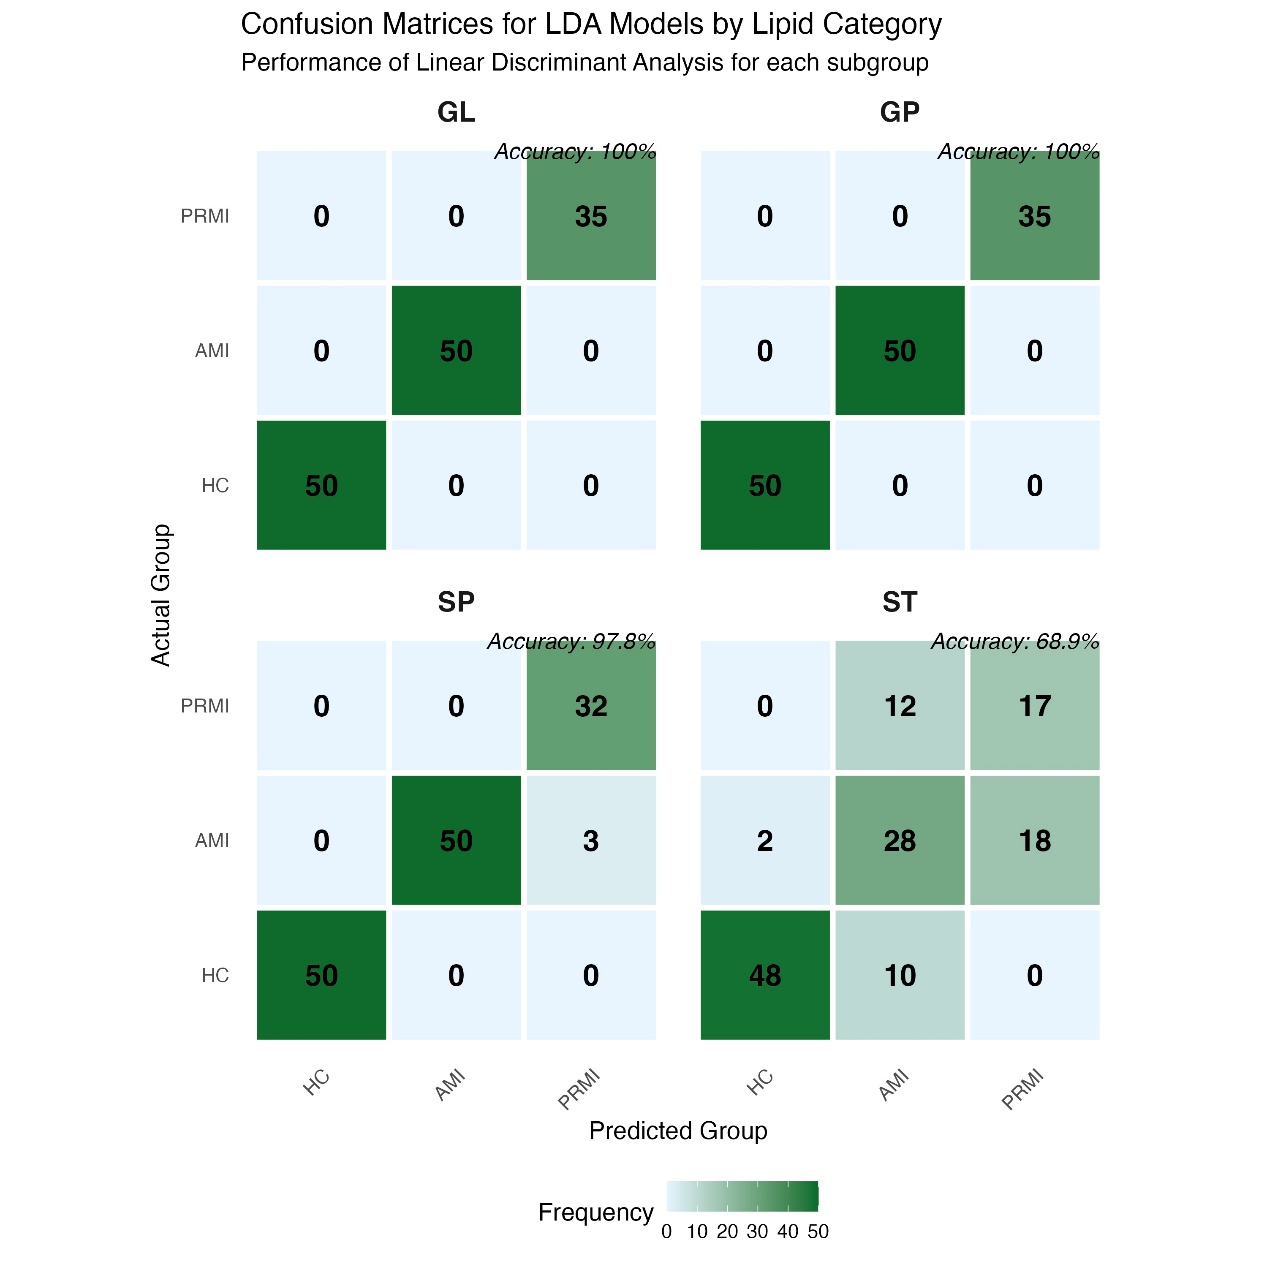


**Figure S1. Confusion Matrices for LDA Models by Lipid Category：**Performance of Linear Discriminant Analysis for each subgroup.

**Supplemental tables**

**Table S1 Baseline characteristics of the study participants**

| **Characteristic** | **HC(n=50)** | **AMI(n=50)** | **PRMI(n=35)** | ***p* value** |
| --- | --- | --- | --- | --- |
| Age(year) | 63.6±12.3 | 65.2±13.5 | 64.6±11.9 | 0.808 |
| Female, n (%) | 2(4.0%) | 14(30.0%) | 10(20%) | 0.022 |

All the data are presented as the means ± SDs. Student’s *t* test was used for statistical analysis, and the Mann‒Whitney U test was used otherwise. The χ2 test was used for sex.
